## Correction: Abnormal topological organization in white matter structural networks in survivors of acute lymphoblastic leukaemia with chemotherapy treatment

Liwei Zou<sup>1,\*</sup>, Lianzi Su<sup>1,\*</sup>, Rongmiao Qi<sup>1,\*</sup>, Fang Bao<sup>1</sup>, Xianjing Fang<sup>1</sup>, Longsheng Wang<sup>1</sup>, Zhimin Zhai<sup>2</sup>, Dan Li<sup>3</sup> and Suisheng Zheng<sup>1,4</sup>

<sup>1</sup>Department of Radiology, The Second Hospital of Anhui Medical University, Anhui, China

<sup>2</sup>Department of Hematology, The Second Hospital of Anhui Medical University, Anhui, China

<sup>3</sup>Department of Scientific Research, The Second Hospital of Anhui Medical University, Anhui, China

<sup>4</sup>Medical Image Research Center, Anhui Medical University, Anhui, China

\* Co-first authors

**Published:** December 12, 2023

**Copyright:** © 2023 Zou et al. This is an open access article distributed under the terms of the [Creative Commons Attribution License](#) (CC BY 4.0), which permits unrestricted use, distribution, and reproduction in any medium, provided the original author and source are credited.

**This article has been corrected:** In the Materials and Methods section, under the ‘MRI Acquisition,’ heading, the model of MRI scanner has been incorrectly spelled as “All MRI examinations were performed with a 3.0 T MR scanner (Trio; Siemens, Erlangen, German) in the Second Hospital of Anhui Medical University.” However, the correct model is “All MRI examinations were performed with a 3.0 T MR scanner (Verio; Siemens, Erlangen, German) in the Second Hospital of Anhui Medical University.” The authors declare that these corrections do not change the results or conclusions of this paper.

Original article: Oncotarget. 2017; 8:60568–60575. <https://doi.org/10.18632/oncotarget.19104>
